# Supplementary material for: Design of active interlayer space in layered oxysulfide photocatalysts NaMTiO2.2S1.8 (M = lanthanoid) for efficient visible light hydrogen evolution
Source: Royal Society of Chemistry journal article supplement (doi:10.1039/d6sc02806c), 2026-06-17
Supplement: d6sc02806c1.pdf [file d6sc02806c1.pdf]

## Supporting Information

### Design of active interlayer space in layered oxysulfide photocatalysts NaM-TiO<sub>2.2</sub>S<sub>1.8</sub> (M = lanthanoid) for efficient visible light hydrogen evolution

Yusuke Ishii,<sup>a</sup> Chisato Hanafusa,<sup>a</sup> Hajime Suzuki,<sup>\*a,b</sup> Daichi Kato,<sup>a</sup> Osamu Tomita,<sup>a</sup> Akinobu Nakada,<sup>a</sup> Shunsuke Nozawa,<sup>c</sup> Akinori Saeki,<sup>d</sup> Ryu Abe<sup>\*a</sup>

<sup>a</sup> Department of Energy and Hydrocarbon Chemistry, Graduate School of Engineering, Kyoto University, Nishikyo-ku, Kyoto 615-8510, Japan

<sup>b</sup> Precursory Research for Embryonic Science and Technology (PRESTO), Japan Science and Technology Agency (JST), 4-1-8 Honcho, Kawaguchi, Saitama 332-0012, Japan

<sup>c</sup> Photon Factory (PF), Institute of Materials Structure Science (IMSS), High Energy Accelerator Research Organization (KEK), Tsukuba, Ibaraki 305-0801, Japan

<sup>d</sup> Department of Applied Chemistry, Graduate School of Engineering, Osaka University, 2-1 Yamadaoka, Suita, Osaka 565-0871, Japan

\* Corresponding Author: suzuki.hajime.7x@kyoto-u.ac.jp, ryu-abe@scl.kyoto-u.ac.jp

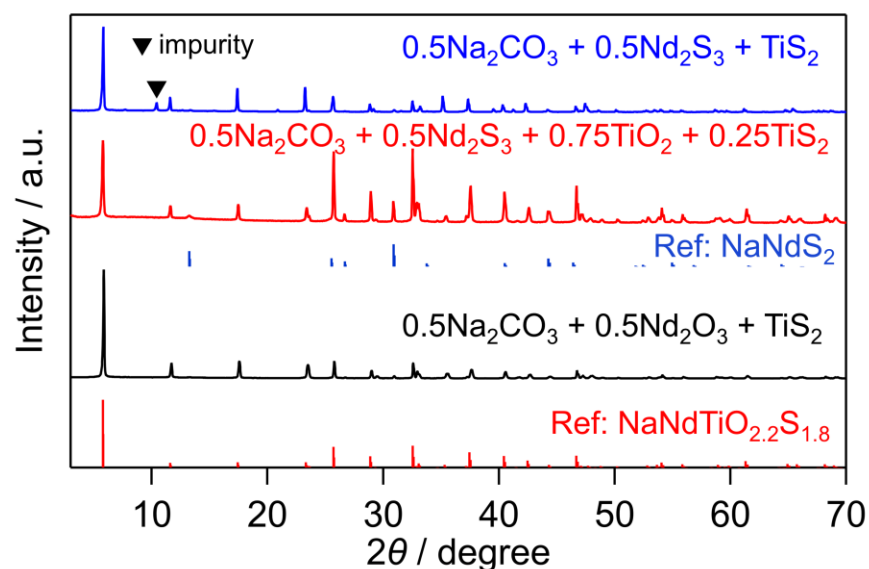

**Figure S1.** X-ray diffraction (XRD) patterns of the samples obtained *via* solid-state reaction (SSR) using various precursors at 1223 K, along with reference patterns of NaNdTlO<sub>2.2</sub>S<sub>1.8</sub> (previous study<sup>1</sup>) and NaNdS<sub>2</sub> (ICSD #644913).

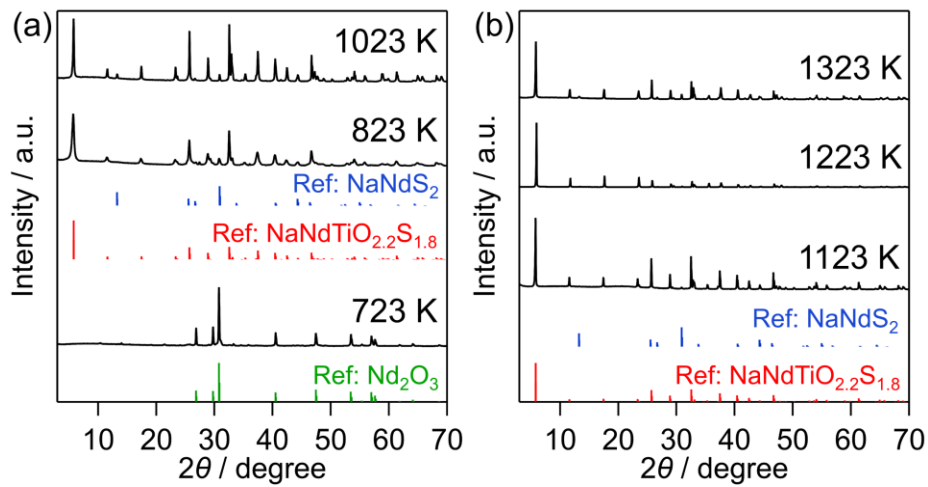

**Figure S2.** XRD patterns of the samples obtained *via* SSR at various temperatures ((a) 723–1023 K and (b) 1123–1323 K), along with reference patterns of  $\text{Nd}_2\text{O}_3$  (ICSD #100206),  $\text{NaNdTiO}_{2.2}\text{S}_{1.8}$  (previous study), and  $\text{NaNdS}_2$  (ICSD #644913).

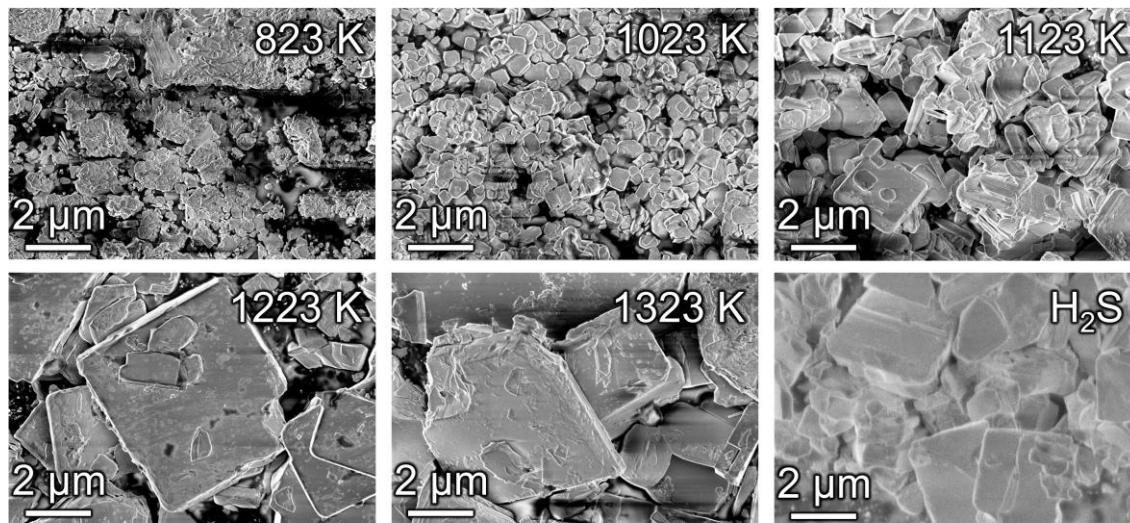

**Figure S3.** Scanning electron microscopy (SEM) images of  $\text{NaNdTiO}_{2.2}\text{S}_{1.8}$  obtained *via* SSR at 823–1323 K and previous  $\text{H}_2\text{S}$ -based method at 1223 K.

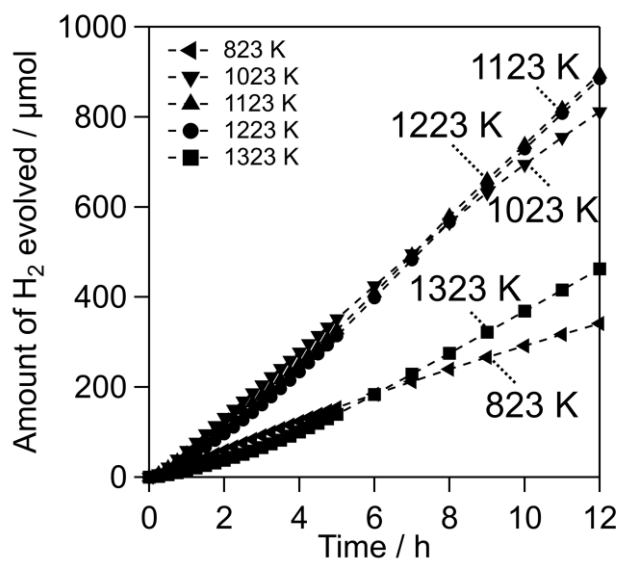

**Figure S4.** Time courses of photocatalytic H<sub>2</sub> evolution on Rh(out)/NaNdTiO<sub>2.2</sub>S<sub>1.8</sub> synthesized *via* SSR at 823–1323 K from water with electron donors (S<sup>2-</sup> and SO<sub>3</sub><sup>2-</sup>) under visible light (400 <  $\lambda$  < 800 nm).

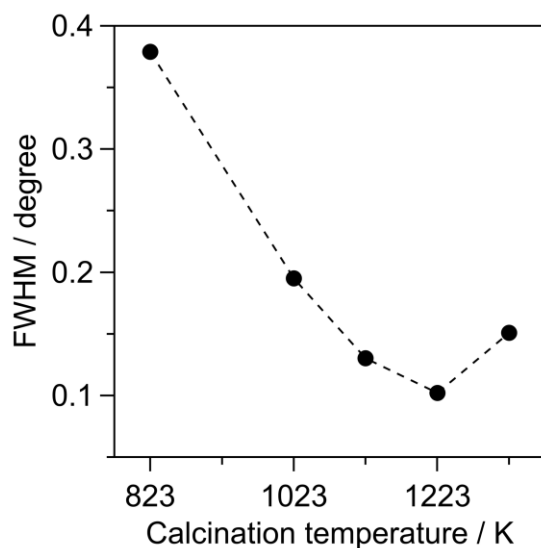

**Figure S5.** Full width at half maximum (FWHM) of the (001) diffraction peak in the XRD patterns of NaNdTiO<sub>2.2</sub>S<sub>1.8</sub> obtained *via* SSR at 823–1323 K.

**Table S1.** Na/Ti, Nd/Ti, and S/Ti atomic ratios, determined by energy dispersive X-ray spectroscopy (EDX) measurement, for  $\text{NaNdTiO}_{2.2}\text{S}_{1.8}$  obtained *via* SSR at 823–1323 K.

| $\text{NaNdTiO}_{2.2}\text{S}_{1.8}$ (SSR) | Na/Ti | Nd/Ti | S/Ti |
|--------------------------------------------|-------|-------|------|
| 823 K                                      | 1.11  | 0.89  | 1.60 |
| 1023 K                                     | 1.03  | 1.03  | 1.62 |
| 1123 K                                     | 1.07  | 1.04  | 1.59 |
| 1223 K                                     | 1.13  | 0.98  | 1.60 |
| 1323 K                                     | 0.86  | 0.95  | 1.33 |

The samples synthesized at 1023, 1123, and 1223 K exhibited higher activity than those obtained at the other temperatures. To clarify the origin of this enhanced activity, their crystallinities were compared based on the FWHMs of the XRD pattern and compositional ratios derived from EDX analysis. As shown in Figure S5, the FWHM decreased monotonically from 823 to 1223 K, with a pronounced reduction between 823 and 1023 K. In contrast, the FWHM at 1323 K increased compared to that at 1223 K. Furthermore, the compositional ratios remained nearly constant from 823 to 1223 K (Na/Ti  $\approx$  1, Nd/Ti  $\approx$  1, and S/Ti  $\approx$  1.6), whereas the 1323 K sample exhibited decreased ratios (Na/Ti = 0.86, Nd/Ti = 0.95, and S/Ti = 1.33), indicating the presence of a larger number of Na and S vacancies, likely due to volatilization of Na and S (Table S1). These results demonstrate that the samples synthesized at 1123 and 1223 K possess high crystallinity, leading to their high activities. In contrast, the high activity of the 1023 K sample can be attributed to its moderate crystallinity combined with a smaller particle size.

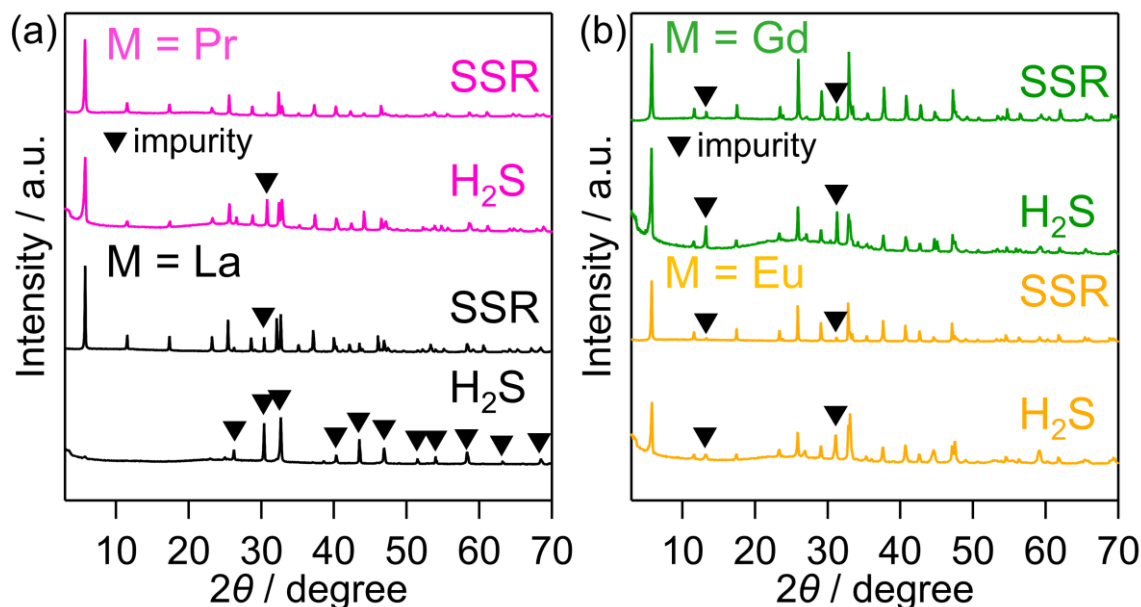

**Figure S6.** XRD patterns of  $\text{NaMTiO}_{2.2}\text{S}_{1.8}$  (M = La, Pr, Eu, and Gd) obtained *via* SSR at 1023 K and previous  $\text{H}_2\text{S}$ -based method at 1223 K.<sup>1</sup>

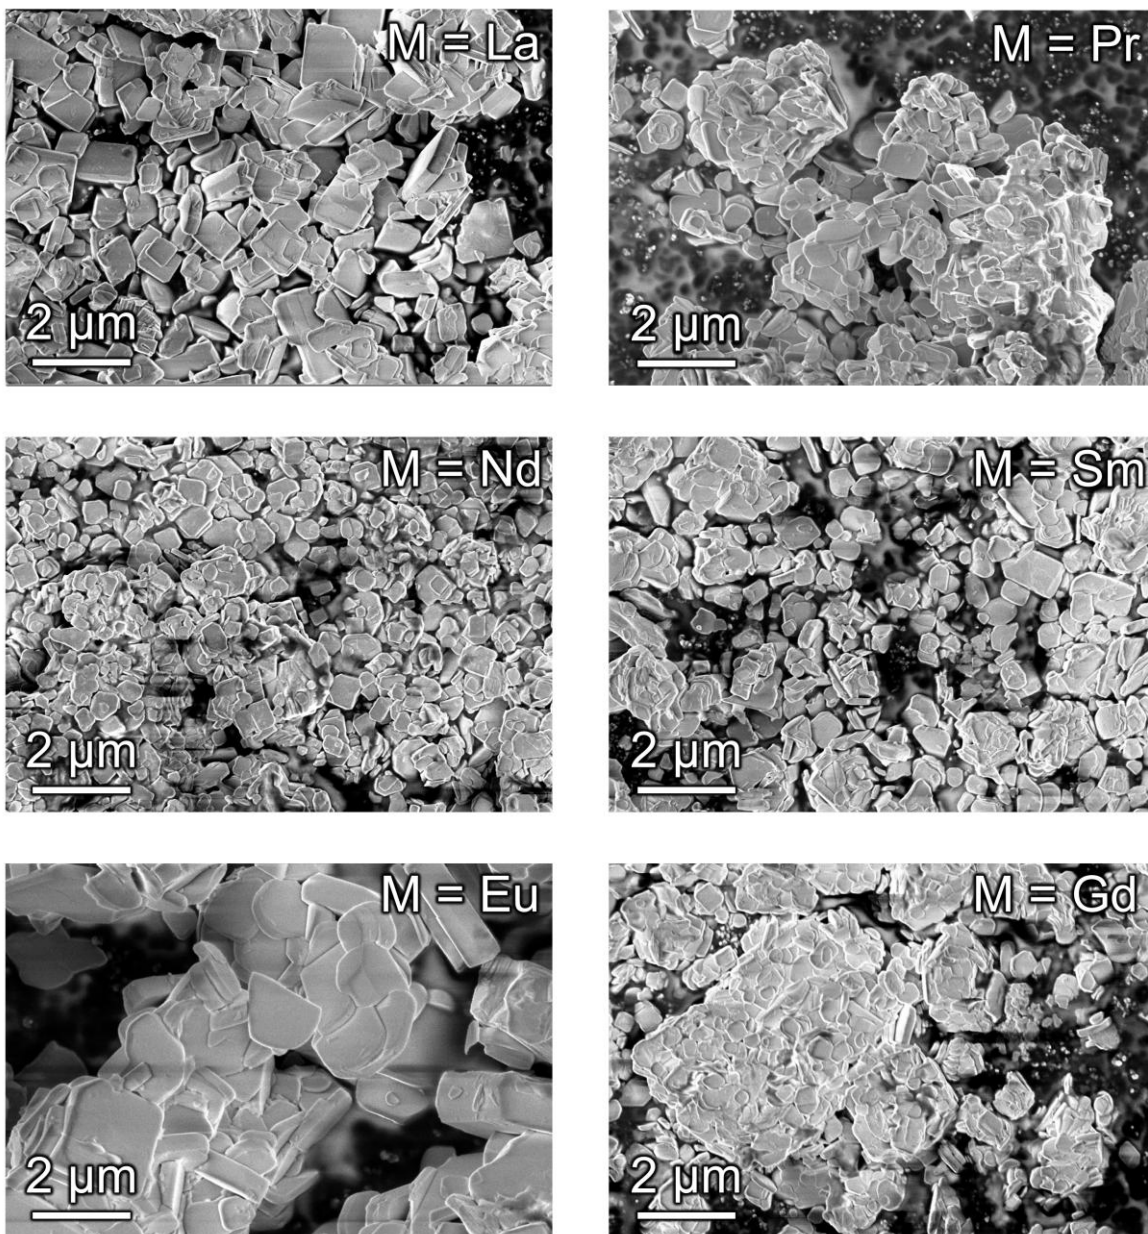

**Figure S7.** SEM images of  $\text{NaMTiO}_{2.2}\text{S}_{1.8}$  ( $M = \text{La}, \text{Pr}, \text{Nd}, \text{Sm}, \text{Eu},$  and  $\text{Gd}$ ) obtained *via* SSR at 1023 K.

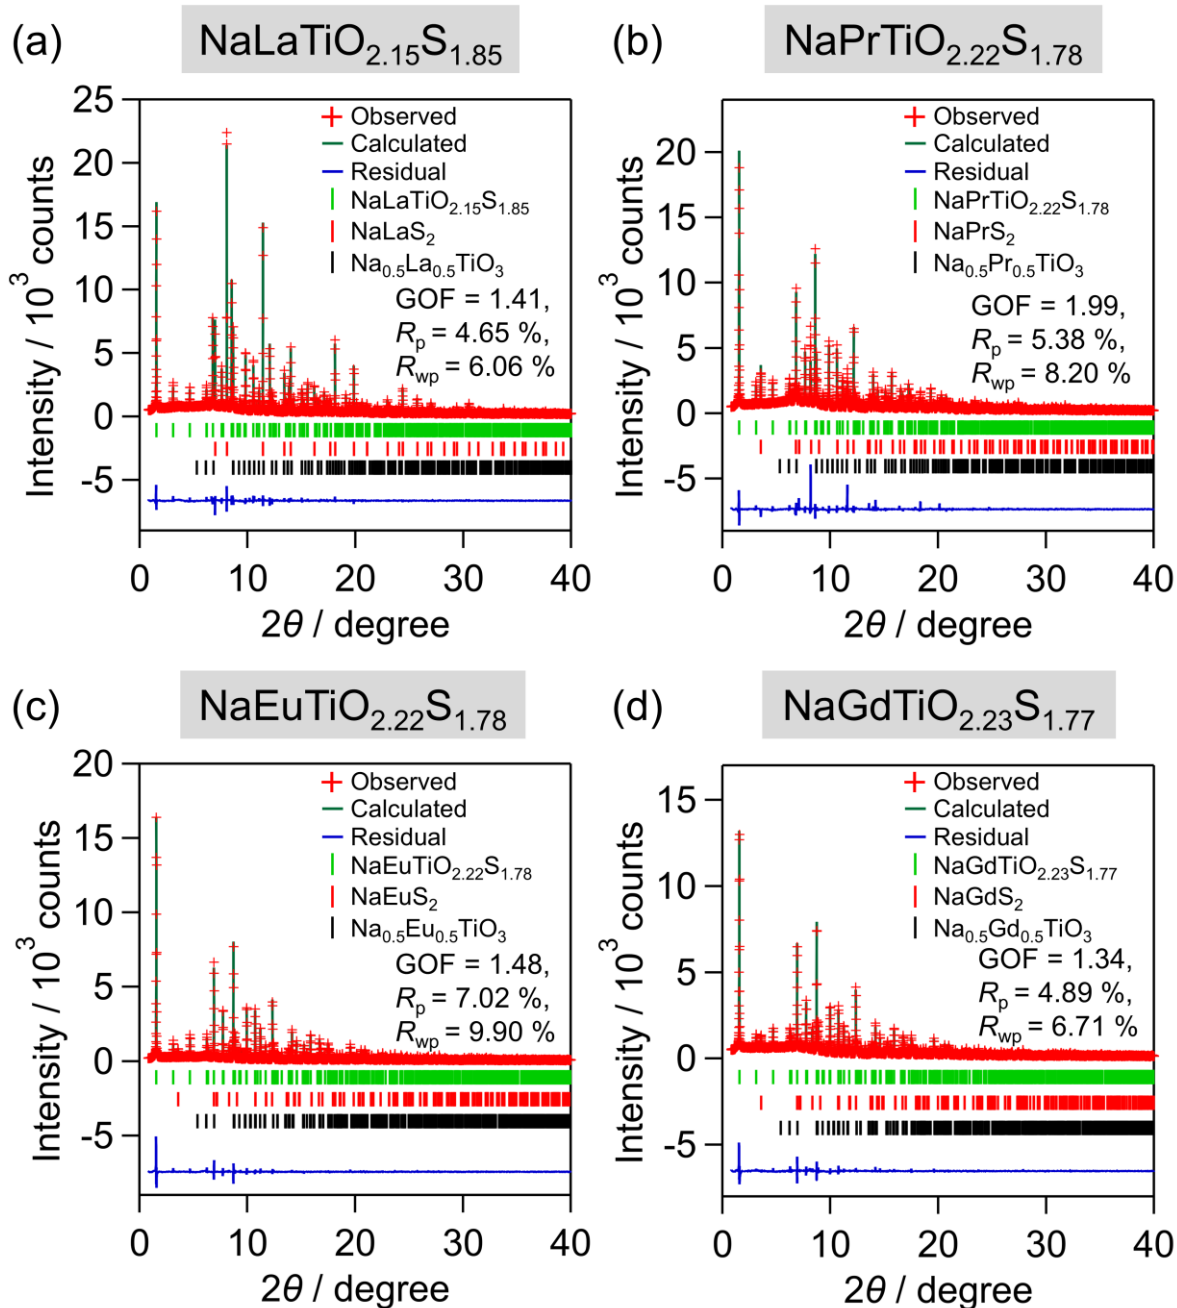

**Figure S8.** Rietveld refinement of the synchrotron X-ray powder diffraction (SXRPD) patterns of the samples prepared *via* SSR at 1023 K (M = (a) La, (b) Pr, (c) Eu, and (d) Gd) using structural models of NaMTiO<sub>2.22</sub>S<sub>1.8</sub> (Figure S9). The red crosses and the green and blue lines represent the observed, calculated, and residual intensities, respectively. Green ticks indicate calculated Bragg reflections of NaMTiO<sub>2.22</sub>S<sub>1.8</sub>.

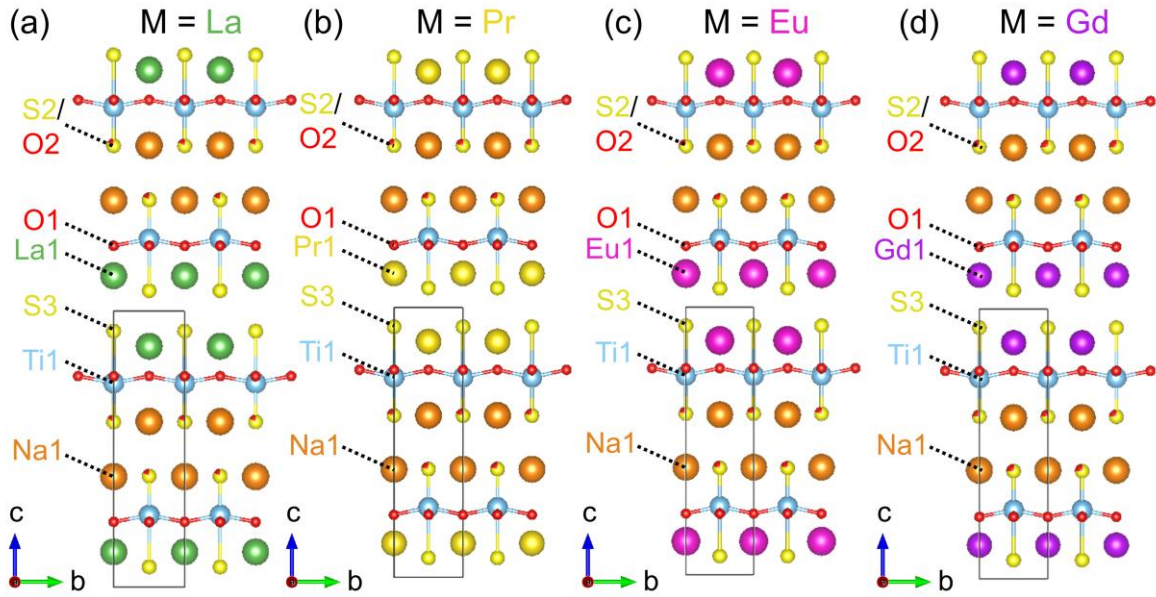

**Figure S9.** Crystal structures of (a)  $\text{NaLaTiO}_{2.15}\text{S}_{1.85}$ , (b)  $\text{NaPrTiO}_{2.22}\text{S}_{1.78}$ , (c)  $\text{NaEuTiO}_{2.22}\text{S}_{1.78}$ , and (d)  $\text{NaGdTiO}_{2.23}\text{S}_{1.77}$ .

**Table S2.** Refined atomic parameters of  $\text{NaLaTiO}_{2.15}\text{S}_{1.85}$  from the SXRD data of the samples prepared via SSR at 1023 K (Figure S8a) using the structural model of  $\text{NaLaTiO}_{2.15}\text{S}_{1.85}$  shown in Figure S9a.

| Site | Occupancy | $x$ | $y$ | $z$        | $U_{\text{iso}} (\text{\AA}^2)$ |
|------|-----------|-----|-----|------------|---------------------------------|
| La1  | 1         | 0   | 0.5 | 0.8724(3)  | 0.0069(9)                       |
| Na1  | 1         | 0   | 0.5 | 0.5995(14) | 0.034(7)                        |
| Ti1  | 1         | 0   | 0.5 | 0.2605(6)  | 0.008(2)                        |
| O1   | 1         | 0   | 0   | 0.2360(15) | 0.008(5)                        |
| S2   | 0.85(4)   | 0   | 0.5 | 0.4020(9)  | 0.011(4)                        |
| O2   | 0.15(4)   | 0   | 0.5 | 0.4020(9)  | 0.011(4)                        |
| S3   | 1         | 0   | 0.5 | 0.0732(9)  | 0.009(3)                        |

$P4/nmm$ ,  $a = b = 3.94042(10) \text{ \AA}$ ,  $c = 15.3319(7) \text{ \AA}$ ,  $R_{\text{wp}} = 6.06 \%$ ,  $R_{\text{p}} = 4.65 \%$ ,  $\text{GOF} = 1.41$

**Table S3.** Refined atomic parameters of  $\text{NaPrTiO}_{2.22}\text{S}_{1.78}$  from the SXRD data of the samples prepared via SSR at 1023 K (Figure S8b) using the structural model of  $\text{NaPrTiO}_{2.22}\text{S}_{1.78}$  shown in Figure S9b.

| Site | Occupancy | $x$ | $y$ | $z$        | $U_{\text{iso}} (\text{\AA}^2)$ |
|------|-----------|-----|-----|------------|---------------------------------|
| Pr1  | 1         | 0   | 0.5 | 0.8739(3)  | 0.0055(9)                       |
| Na1  | 1         | 0   | 0.5 | 0.5999(16) | 0.037(8)                        |
| Ti1  | 1         | 0   | 0.5 | 0.2589(7)  | 0.007(2)                        |
| O1   | 1         | 0   | 0   | 0.2313(17) | 0.007(6)                        |
| S2   | 0.78(5)   | 0   | 0.5 | 0.4007(10) | 0.007(5)                        |
| O2   | 0.22(5)   | 0   | 0.5 | 0.4007(10) | 0.007(5)                        |
| S3   | 1         | 0   | 0.5 | 0.0718(10) | 0.007(3)                        |

$P4/nmm$ ,  $a = b = 3.90102(12) \text{ \AA}$ ,  $c = 15.2626(9) \text{ \AA}$ ,  $R_{\text{wp}} = 8.20 \%$ ,  $R_{\text{p}} = 5.38 \%$ ,  $\text{GOF} = 1.99$

**Table S4.** Refined atomic parameters of NaEuTiO<sub>2.22</sub>S<sub>1.78</sub> from the SXRD data of the samples prepared *via* SSR at 1023 K (Figure S8c) using the structural model of NaEuTiO<sub>2.22</sub>S<sub>1.78</sub> shown in Figure S9c.

| Site | Occupancy | <i>x</i> | <i>y</i> | <i>z</i>   | <i>U</i> <sub>iso</sub> (Å <sup>2</sup> ) |
|------|-----------|----------|----------|------------|-------------------------------------------|
| Eu1  | 1         | 0        | 0.5      | 0.8751(2)  | 0.0052(8)                                 |
| Na1  | 1         | 0        | 0.5      | 0.5982(17) | 0.040(8)                                  |
| Ti1  | 1         | 0        | 0.5      | 0.2553(7)  | 0.007(2)                                  |
| O1   | 1         | 0        | 0        | 0.2283(15) | 0.001(5)                                  |
| S2   | 0.78(5)   | 0        | 0.5      | 0.3986(11) | 0.012(5)                                  |
| O2   | 0.22(5)   | 0        | 0.5      | 0.3986(11) | 0.012(5)                                  |
| S3   | 1         | 0        | 0.5      | 0.0694(10) | 0.007(3)                                  |

*P4/nmm*, *a* = *b* = 3.85471(7) Å, *c* = 15.2154(5) Å, *R*<sub>wp</sub> = 9.90 %, *R*<sub>p</sub> = 7.02 %, GOF = 1.48

**Table S5.** Refined atomic parameters of NaGdTiO<sub>2.23</sub>S<sub>1.77</sub> from the SXRD data of the samples prepared *via* SSR at 1023 K (Figure S8d) using the structural model of NaGdTiO<sub>2.23</sub>S<sub>1.77</sub> shown in Figure S9d.

| Site | Occupancy | <i>x</i> | <i>y</i> | <i>z</i>   | <i>U</i> <sub>iso</sub> (Å <sup>2</sup> ) |
|------|-----------|----------|----------|------------|-------------------------------------------|
| Gd1  | 1         | 0        | 0.5      | 0.8750(2)  | 0.0050(7)                                 |
| Na1  | 1         | 0        | 0.5      | 0.5976(16) | 0.042(8)                                  |
| Ti1  | 1         | 0        | 0.5      | 0.2553(6)  | 0.005(2)                                  |
| O1   | 1         | 0        | 0        | 0.2297(15) | 0.003(5)                                  |
| S2   | 0.77(4)   | 0        | 0.5      | 0.3990(10) | 0.013(5)                                  |
| O2   | 0.23(4)   | 0        | 0.5      | 0.3990(10) | 0.013(5)                                  |
| S3   | 1         | 0        | 0.5      | 0.0696(9)  | 0.007(2)                                  |

*P4/nmm*, *a* = *b* = 3.84397(7) Å, *c* = 15.1563(6) Å, *R*<sub>wp</sub> = 6.71 %, *R*<sub>p</sub> = 4.89 %, GOF = 1.34

**Table S6.** Na/Ti, M/Ti, and S/Ti atomic ratios, determined by EDX measurement, for NaMTiO<sub>2.2</sub>S<sub>1.8</sub> (M = La, Pr, Sm, Nd, Eu, and Gd) obtained *via* SSR at 1023 K.

| NaMTiO <sub>2.2</sub> S <sub>1.8</sub> (SSR) | Na/Ti | M/Ti | S/Ti |
|----------------------------------------------|-------|------|------|
| M = La                                       | 0.93  | 1.13 | 1.60 |
| M = Pr                                       | 0.90  | 0.96 | 1.57 |
| M = Nd                                       | 1.03  | 1.03 | 1.62 |
| M = Sm                                       | 0.95  | 1.00 | 1.65 |
| M = Eu                                       | 0.89  | 1.01 | 1.67 |
| M = Gd                                       | 1.06  | 1.03 | 1.65 |

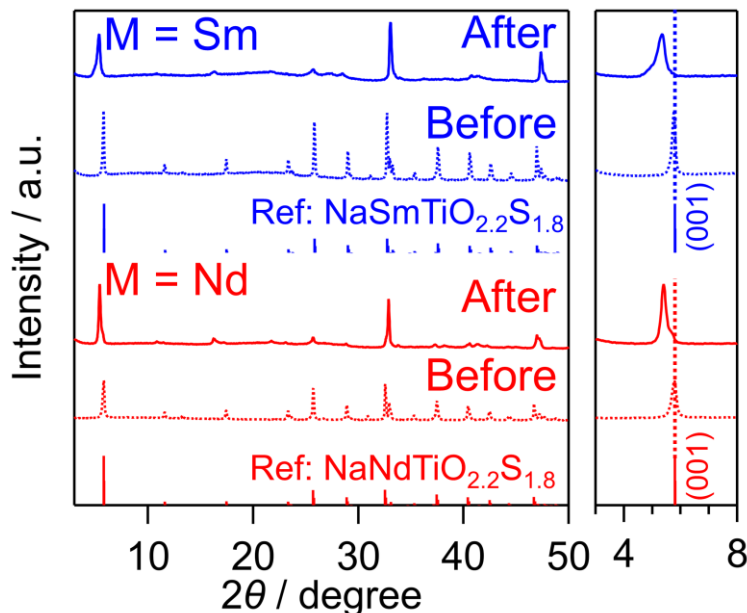

**Figure S10.** XRD patterns of  $\text{NaMTiO}_{2.2}\text{S}_{1.8}$  ( $M = \text{Nd}$  and  $\text{Sm}$ ) obtained *via* SSR at 1023 K before and after immersion in a  $\text{H}_2\text{SO}_4$  aqueous solution ( $\text{pH} = 2.5$ ) for 1 h under dark conditions, along with reference patterns of  $\text{NaMTiO}_{2.2}\text{S}_{1.8}$  (previous study).

**Table S7.** Na/Ti atomic ratio, determined by EDX measurement, for  $\text{NaMTiO}_{2.2}\text{S}_{1.8}$  ( $M = \text{La}, \text{Pr}, \text{Sm}, \text{Nd}, \text{Eu},$  and  $\text{Gd}$ ) after immersion in a  $\text{H}_2\text{SO}_4$  aqueous solution ( $\text{pH} = 2.5$ ) for 1 h under dark conditions.

| $\text{NaMTiO}_{2.2}\text{S}_{1.8}$ (SSR) | Before | After |
|-------------------------------------------|--------|-------|
| $M = \text{La}$                           | 0.93   | 0.5   |
| $M = \text{Pr}$                           | 0.90   | 0.2   |
| $M = \text{Nd}$                           | 1.03   | 0.26  |
| $M = \text{Sm}$                           | 0.95   | 0.11  |
| $M = \text{Eu}$                           | 0.89   | 0.07  |
| $M = \text{Gd}$                           | 1.06   | 0.22  |

**Table S8.** S/Ti atomic ratio, determined by EDX measurement, for  $\text{NaMTiO}_{2.2}\text{S}_{1.8}$  ( $M = \text{La}, \text{Pr}, \text{Sm}, \text{Nd}, \text{Eu},$  and  $\text{Gd}$ ) after immersion in a  $\text{H}_2\text{SO}_4$  aqueous solution ( $\text{pH} = 2.5$ ) for 1 h under dark conditions.

| $\text{NaMTiO}_{2.2}\text{S}_{1.8}$ (SSR) | Before | After |
|-------------------------------------------|--------|-------|
| $M = \text{Pr}$                           | 1.57   | 0.95  |
| $M = \text{Nd}$                           | 1.62   | 0.95  |
| $M = \text{Sm}$                           | 1.65   | 0.93  |
| $M = \text{Eu}$                           | 1.67   | 0.91  |
| $M = \text{Gd}$                           | 1.65   | 0.93  |

As previously reported,<sup>1</sup> the S2 site in  $\text{NaMTiO}_{2.2}\text{S}_{1.8}$  is less stable than the S3 site, making O/S substitution more likely to occur. Consequently, after immersion in the  $\text{H}_2\text{SO}_4$  aqueous solution, all samples exhibited S/Ti ratios close to 1 (Table S8). When approximating the compositions of the  $\text{H}_2\text{SO}_4$ -treated samples as  $\text{H}_x\text{Na}_{1-x}\text{MTiO}_{4-y}\text{S}_y \cdot n\text{H}_2\text{O}$ , the parameter  $y$  was fixed at 1, and this value was also used in the thermogravimetric-differential thermal analysis (TG-DTA) shown in Figure S11.

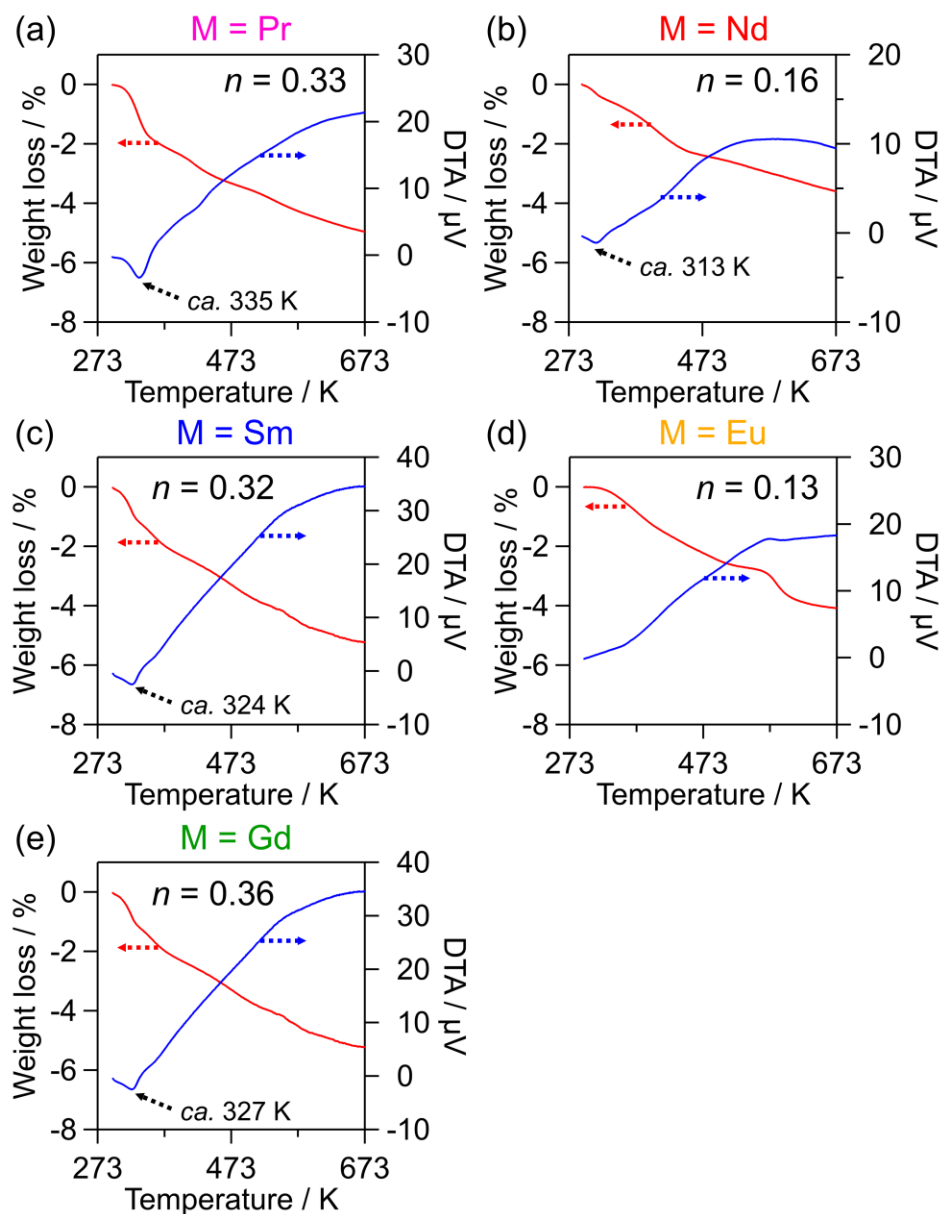

**Figure S11.** TG-DTA profiles under an  $N_2$  flow (100 mL/min) of  $NaMTiO_{2.2}S_{1.8}$  ( $M =$  (a) Pr, (b) Nd, (c) Sm, (d) Eu, and (e) Gd) obtained *via* SSR at 1023 K after immersion in a  $H_2SO_4$  aqueous solution (pH = 2.5) for 1 h under dark conditions.

To estimate the amount of interlayer hydration, TG-DTA measurements were performed for  $NaMTiO_{2.2}S_{1.8}$  after immersion in a  $H_2SO_4$  aqueous solution (pH = 2.5) for 1 h. For all samples except  $M = Eu$ , negative DTA peaks (endothermic peaks) were observed at 313–335 K, which are attributable to the release of interlayer water molecules. The dehydration in this temperature range has also been reported for similar layered oxides such as  $NaNdTiO_4$ .<sup>2</sup> Therefore, we assume that the mass loss up to 373 K, at which this peak disappeared, corresponds to the removal of interlayer water. The obtained composition was approximated as  $H_xNa_{1-x}MTiO_{4-y}S_y \cdot nH_2O$ , where  $x$  was determined by EDX analysis (Table S7), and  $y$  was fixed at 1 (Table S8). Based on these assumptions, the interlayer hydration amount  $n$  was estimated.

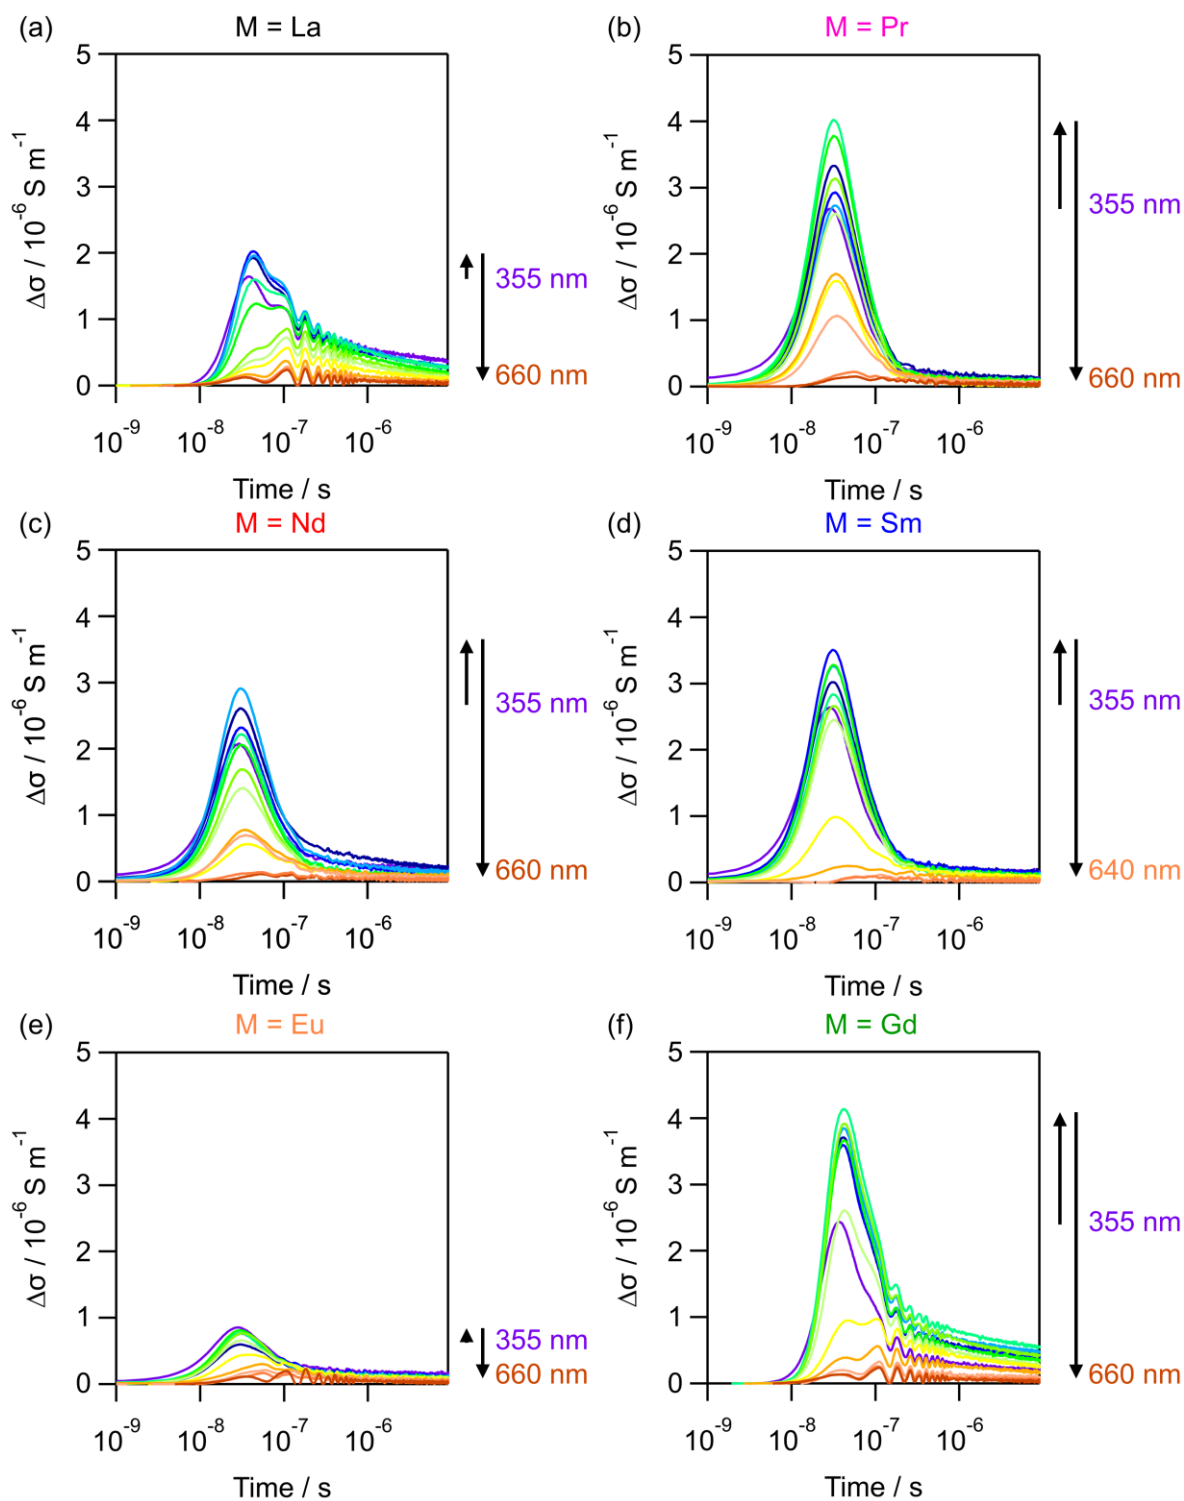

**Figure S12.** Photoconductivity transients ( $\Delta\sigma$ ) obtained by time-resolved microwave conductivity (TRMC) measurements for  $\text{NaMTiO}_{2.2}\text{S}_{1.8}$  (M = (a) La, (b) Pr, (c) Nd, (d) Sm, (e) Eu, and (f) Gd) prepared *via* SSR at 1023 K ( $\lambda_{\text{ex}} = 355\text{--}660$  nm,  $I_0 = 4.6 \times 10^{15}$  photons  $\text{cm}^{-2}$  per pulse $^{-1}$ ).

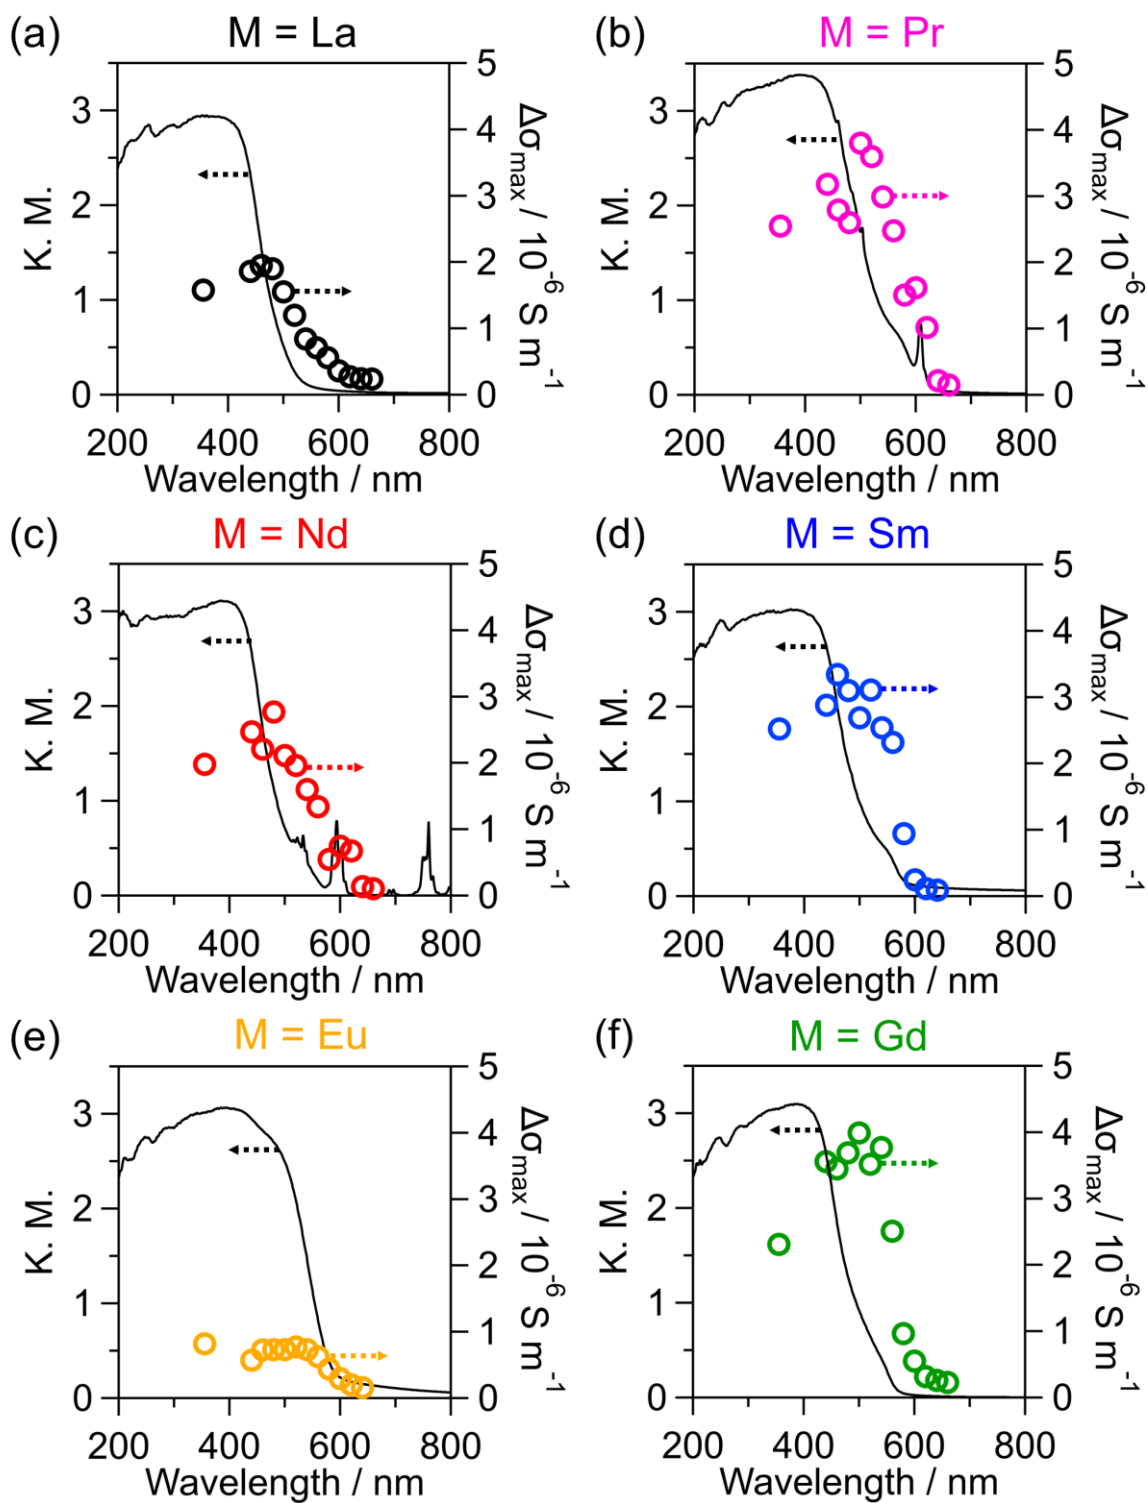

**Figure S13.** UV-vis diffuse reflectance spectra and wavelength dependence of  $\Delta\sigma_{\max}$  obtained by TRMC measurements of  $\text{NaMTiO}_{2.2}\text{S}_{1.8}$  ( $M =$  (a) La, (b) Pr, (c) Nd, (d) Sm, (e) Eu, and (f) Gd) synthesized via SSR at 1023 K.

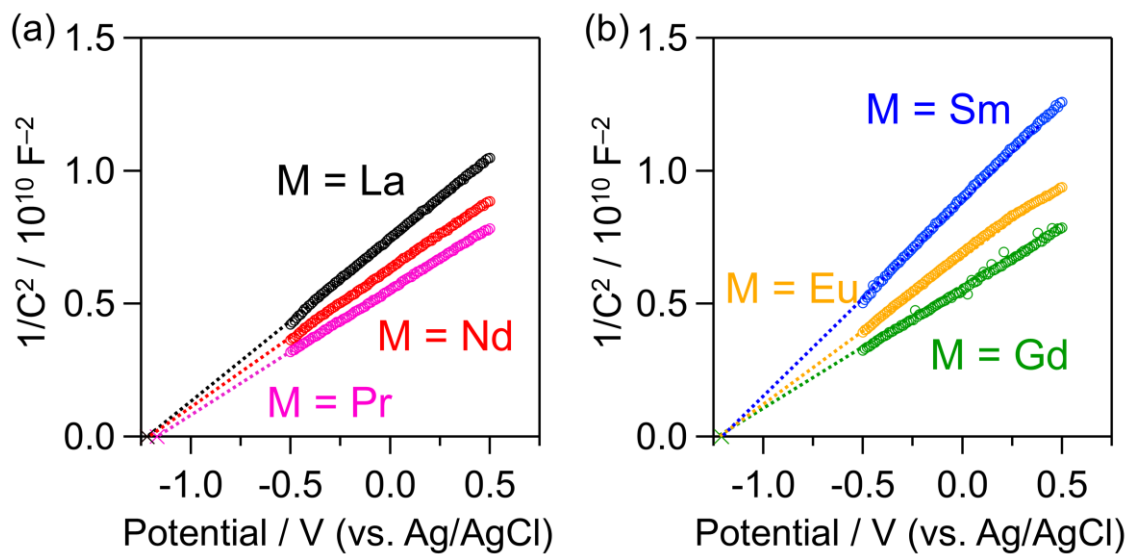

**Figure S14.** Mott-Schottky plots for  $\text{NaMTiO}_{2.2}\text{S}_{1.8}$  ( $M =$  (a) La, Pr, Nd and (b) Sm, Eu, Gd) obtained via SSR at 1023 K.

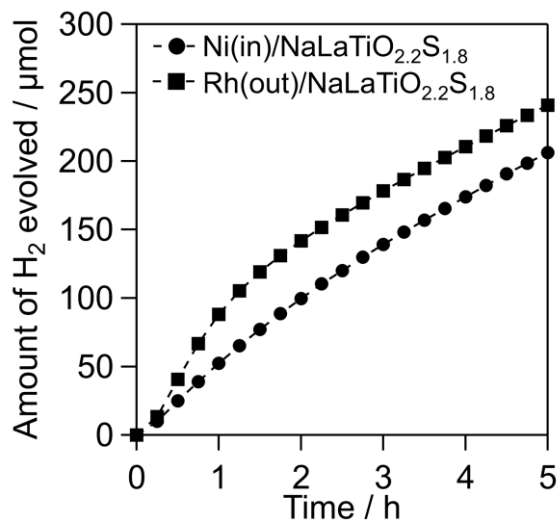

**Figure S15.** Time courses of photocatalytic  $\text{H}_2$  evolution on  $\text{Ni(in)/NaLaTiO}_{2.2}\text{S}_{1.8}$  and  $\text{Rh(out)/NaLaTiO}_{2.2}\text{S}_{1.8}$  from water with electron donors ( $\text{S}^{2-}$  and  $\text{SO}_3^{2-}$ ) under visible light ( $400 < \lambda < 800 \text{ nm}$ ).

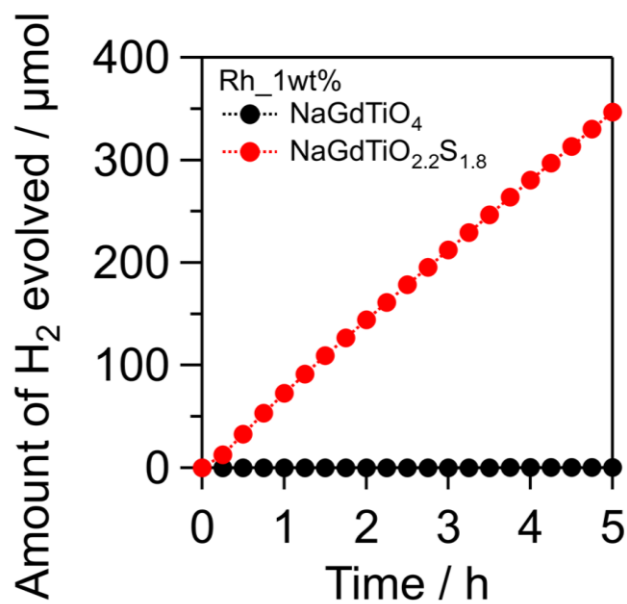

**Figure S16.** Time courses of photocatalytic H<sub>2</sub> evolution on Rh(out)/NaGdTiO<sub>4</sub> and Rh(out)/NaGdTiO<sub>2.2</sub>S<sub>1.8</sub> from water with electron donors (S<sup>2-</sup> and SO<sub>3</sub><sup>2-</sup>) under visible light (400 < λ < 800 nm).

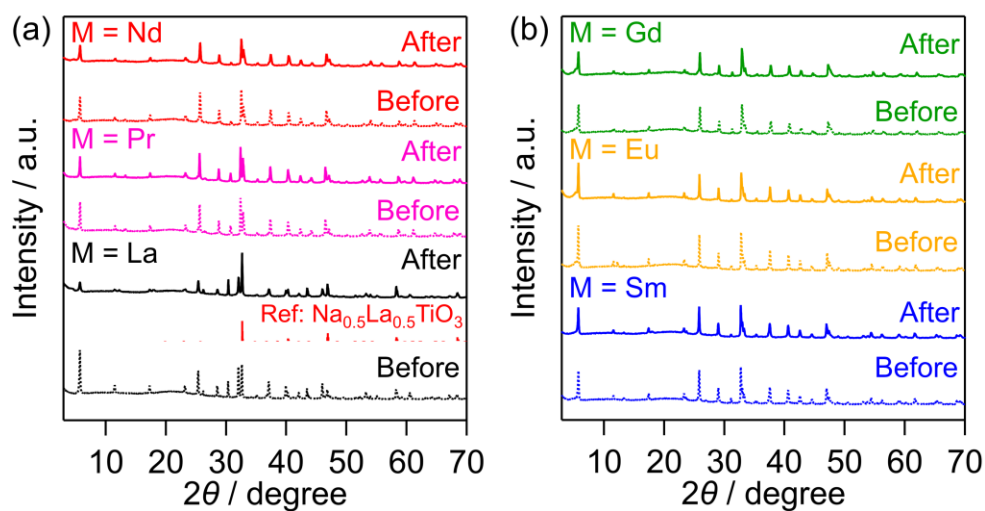

**Figure S17.** XRD patterns of Ni(in)/NaMTiO<sub>2.2</sub>S<sub>1.8</sub> (M = (a) La, Pr, Nd, and (b) Sm, Eu, Gd) before and after the photocatalytic H<sub>2</sub> evolution reaction, along with reference patterns of Na<sub>0.5</sub>La<sub>0.5</sub>TiO<sub>3</sub> (ICSD #51029).

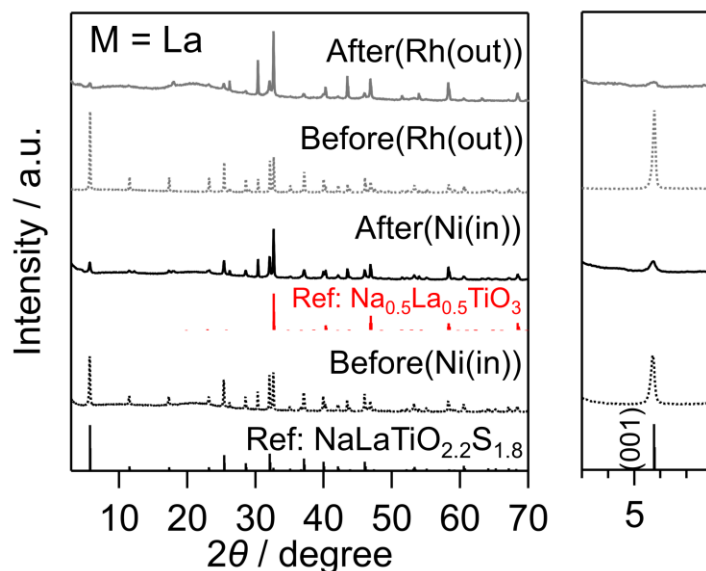

**Figure S18.** XRD patterns of  $\text{NaLaTiO}_{2.2}\text{S}_{1.8}$  before and after the photocatalytic  $\text{H}_2$  evolution reaction (loaded with Ni(in) or Rh(out)), along with reference patterns of  $\text{NaLaTiO}_{2.2}\text{S}_{1.8}$  (this study) and  $\text{Na}_{0.5}\text{La}_{0.5}\text{TiO}_3$  (ICSD #51029).

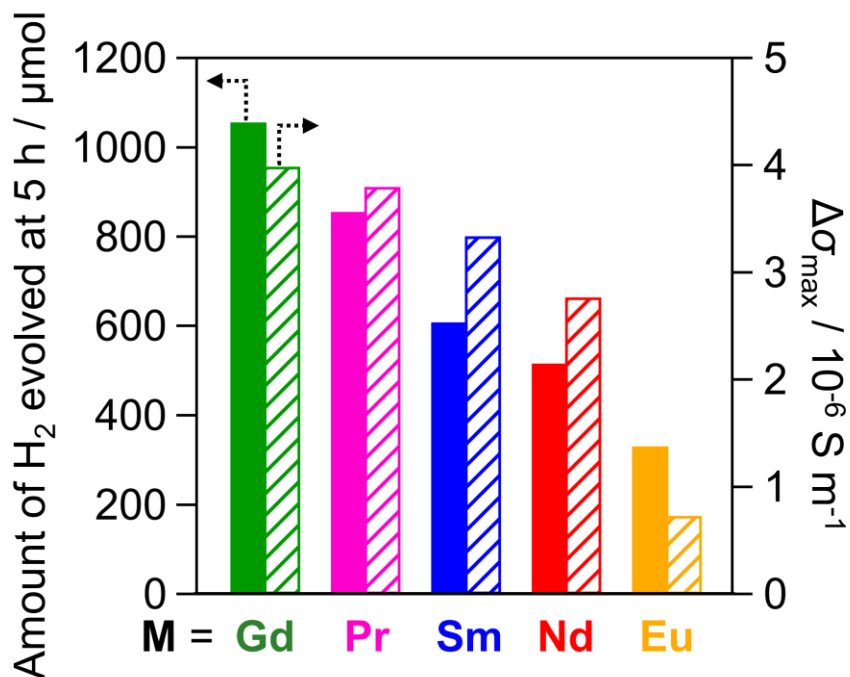

**Figure S19.** Amount of  $\text{H}_2$  evolution at 5 h on Ni(in)/ $\text{NaMTiO}_{2.2}\text{S}_{1.8}$  ( $M = \text{Pr, Nd, Sm, Eu, and Gd}$ ) (solid bars) and  $\Delta\sigma_{\text{max}}$  obtained from TRMC measurements ( $\lambda_{\text{ex}} = 460$  ( $M = \text{Sm}$ ) or  $480$  ( $M = \text{Nd}$ ) or  $500$  nm ( $M = \text{Pr, Eu, Gd}$ ),  $I_0 = 4.6 \times 10^{15} \text{ photons cm}^{-2} \text{ pulse}^{-1}$ ) for  $\text{NaMTiO}_{2.2}\text{S}_{1.8}$ .

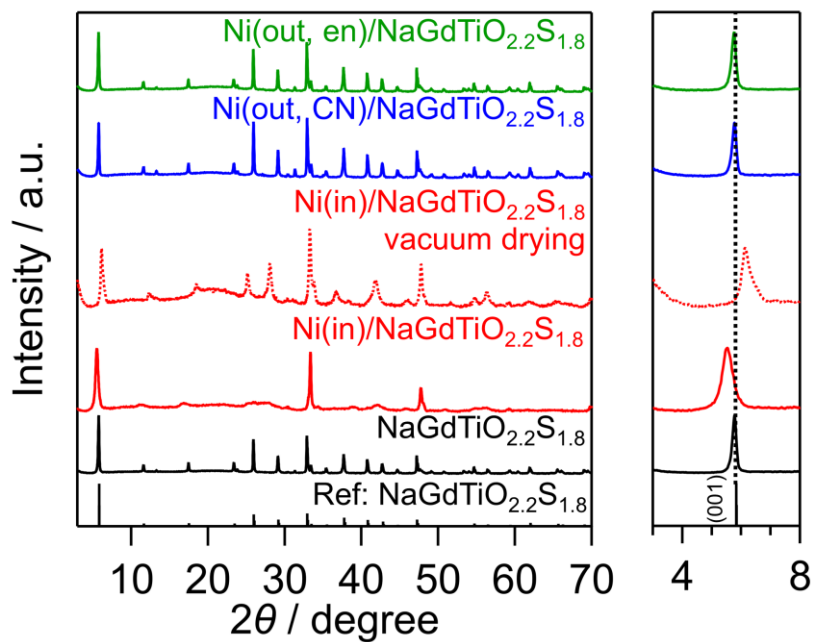

**Figure S20.** XRD patterns of NaGdTiO<sub>2.2</sub>S<sub>1.8</sub> before and after immersion in an Ni(NO<sub>3</sub>)<sub>2</sub> (Ni(in)), [Ni(en)<sub>3</sub>](NO<sub>3</sub>)<sub>2</sub> (Ni(out, en)) (en = ethylenediamine), or K<sub>2</sub>[Ni(CN)<sub>4</sub>] (Ni(out, CN)) aqueous solution for 24 h, followed by vacuum drying, along with reference patterns of NaGdTiO<sub>2.2</sub>S<sub>1.8</sub> (this study). All treatments were performed using Ni precursor amounts corresponding to a Na:Ni molar ratio of 2:1.

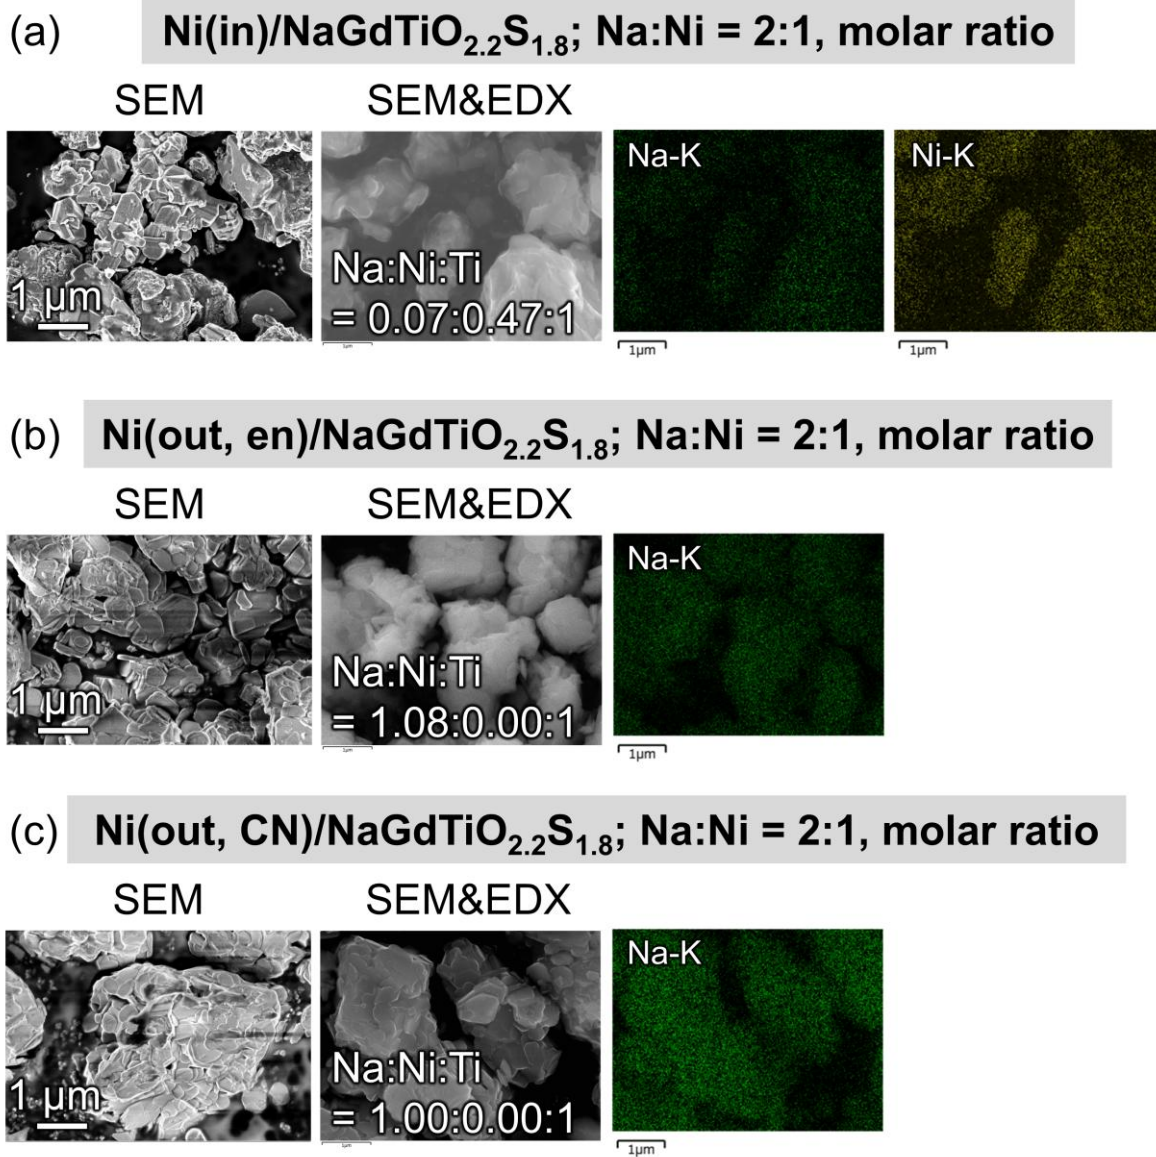

**Figure S21.** SEM images and SEM-EDX elemental mappings of NaGdTiO<sub>2.2</sub>S<sub>1.8</sub> after immersion in an (a) Ni(NO<sub>3</sub>)<sub>2</sub>, (b) [Ni(en)<sub>3</sub>](NO<sub>3</sub>)<sub>2</sub> and (c) K<sub>2</sub>[Ni(CN)<sub>4</sub>] aqueous solution for 24 h ((a) Ni(in)/NaGdTiO<sub>2.2</sub>S<sub>1.8</sub>, (b) Ni(out, en)/NaGdTiO<sub>2.2</sub>S<sub>1.8</sub> and (c) Ni(out, CN)/NaGdTiO<sub>2.2</sub>S<sub>1.8</sub>; Na:Ni = 2:1, molar ratio).

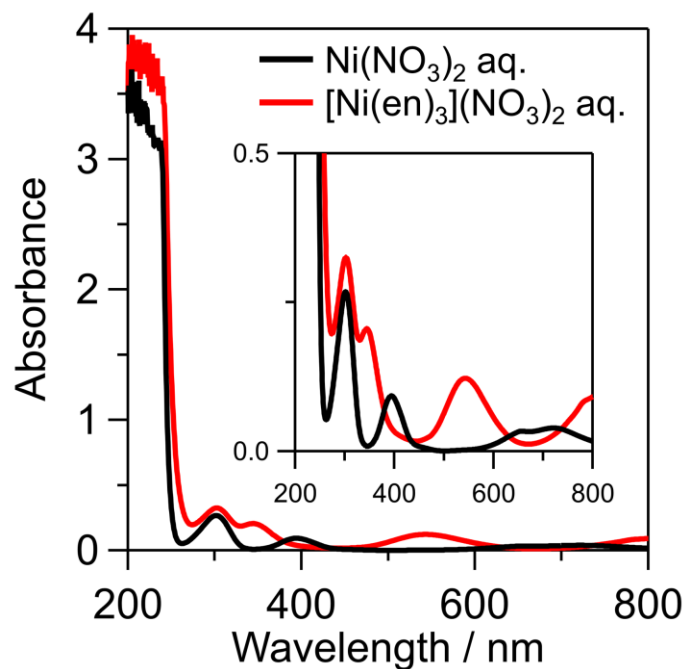

**Figure S22.** Absorption spectra of  $\text{Ni}(\text{NO}_3)_2$  (black) and  $[\text{Ni}(\text{en})_3](\text{NO}_3)_2$  (red) aqueous solutions used for Ni loading onto  $\text{NaMTiO}_{2.2}\text{S}_{1.8}$ .

The absorption spectrum of  $[\text{Ni}(\text{en})_3]^{2+}$  is consistent with the previously reported spectrum of  $[\text{Ni}(\text{en})_3]^{2+}$ .<sup>3</sup>

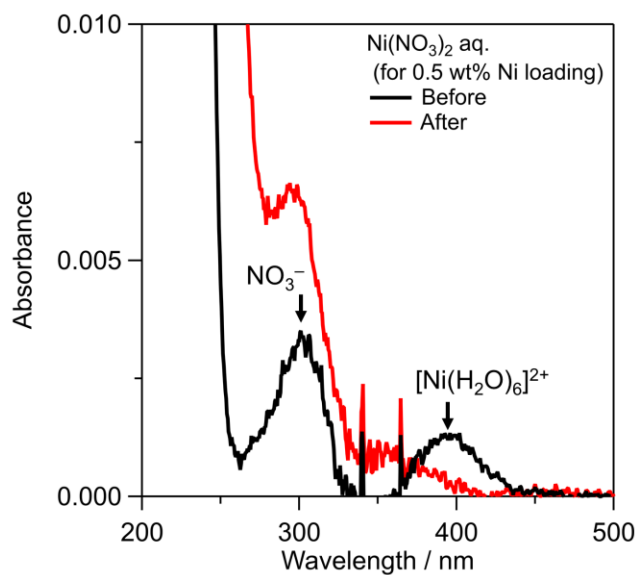

**Figure S23.** Absorption spectra of aqueous solutions of  $\text{Ni}(\text{NO}_3)_2$  corresponding to a Ni loading amount of 0.5 wt% on  $\text{NaGdTiO}_{2.2}\text{S}_{1.8}$ , before and after immersion of  $\text{NaGdTiO}_{2.2}\text{S}_{1.8}$  for 24 h.

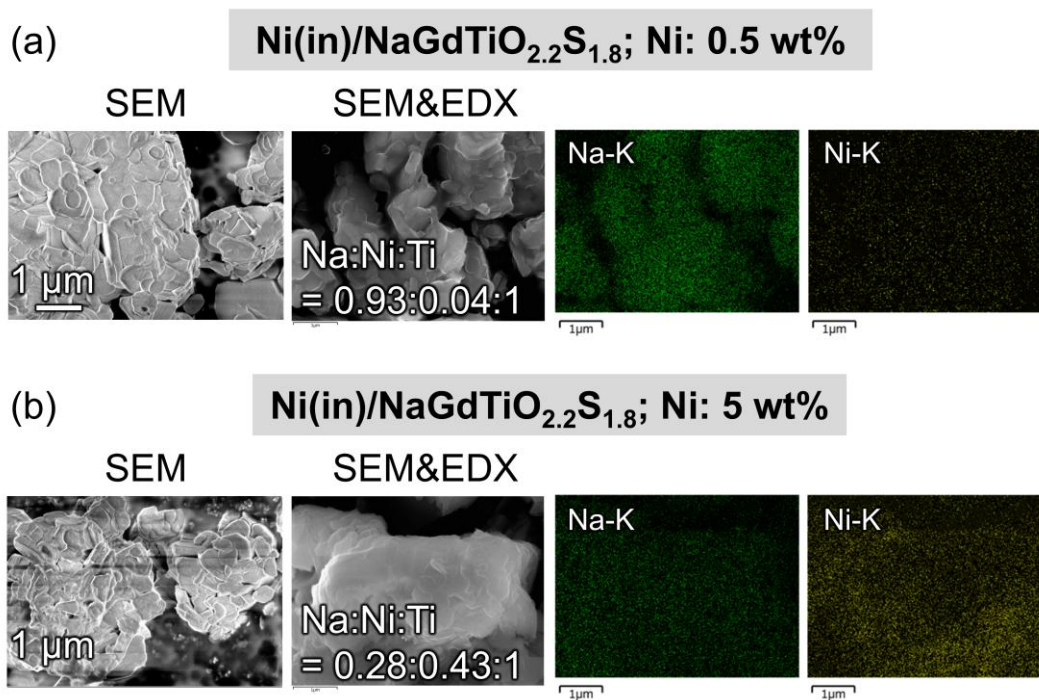

**Figure S24.** SEM images and SEM-EDX elemental mappings of NaGdTiO<sub>2.2</sub>S<sub>1.8</sub> after immersion in an Ni(NO<sub>3</sub>)<sub>2</sub> aqueous solution for 24 h (Ni(in)/NaGdTiO<sub>2.2</sub>S<sub>1.8</sub>; Ni: (a) 0.5 and (b) 5 wt% as Ni metal).

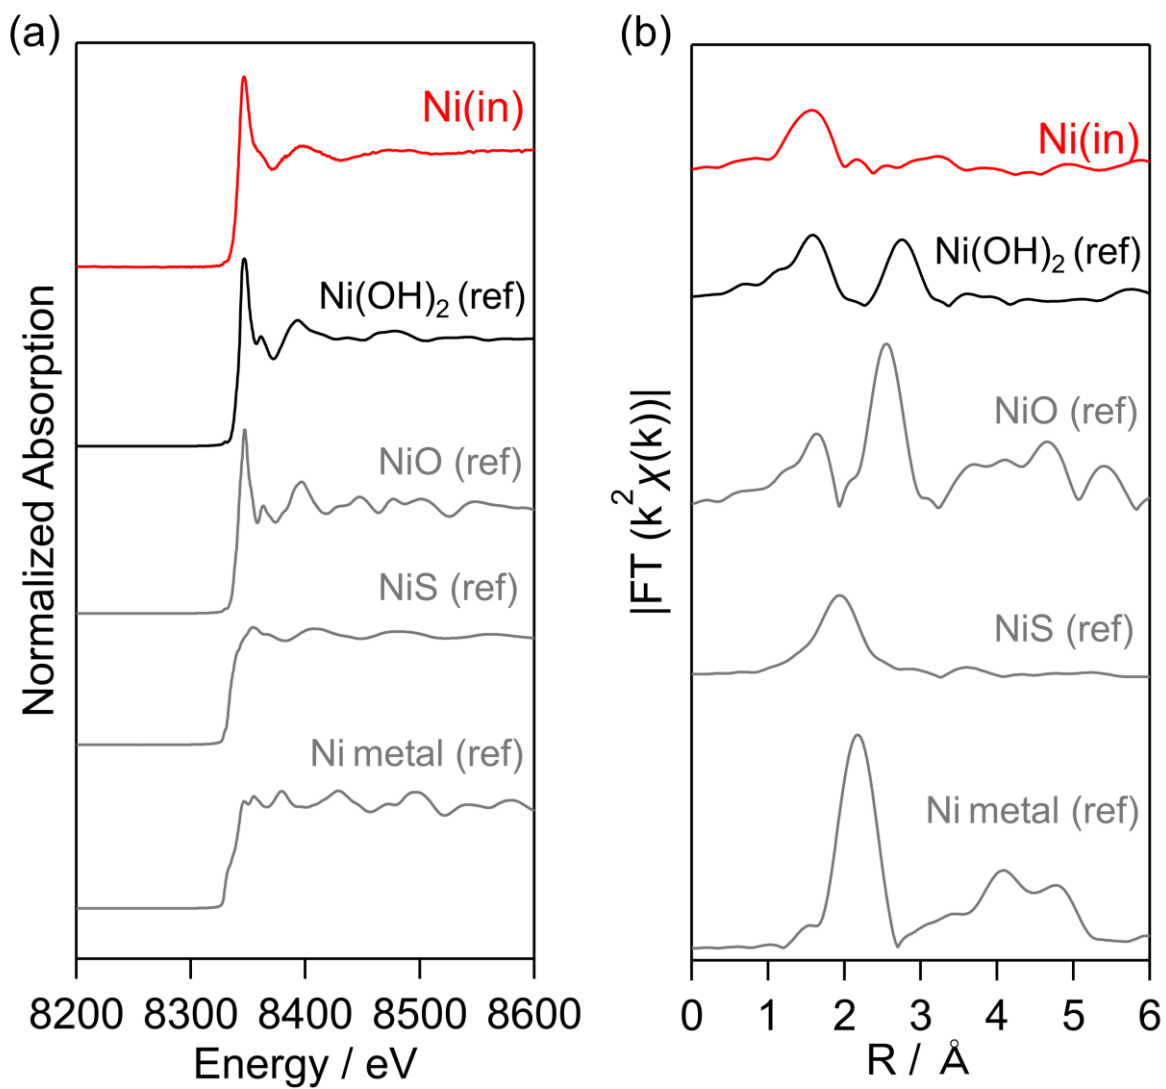

**Figure S25.** Ni K-edge (a) X-ray absorption near edge structure (XANES) and (b) Fourier transforms of extended X-ray absorption fine structure (EXAFS) spectra of Ni(in)/NaGdTiO<sub>2.2</sub>S<sub>1.8</sub> (Ni 0.5 wt% as Ni metal), along with the spectra of reference samples.

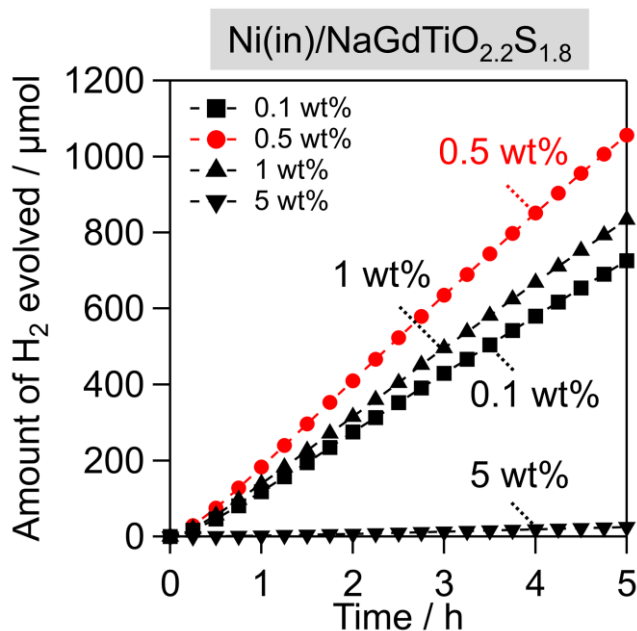

**Figure S26.** Time courses of photocatalytic H<sub>2</sub> evolution on Ni(in)/NaGdTiO<sub>2.2</sub>S<sub>1.8</sub> loaded with different amounts of Ni species from water with electron donors (S<sup>2-</sup> and SO<sub>3</sub><sup>2-</sup>) under visible light (400 < λ < 800 nm).

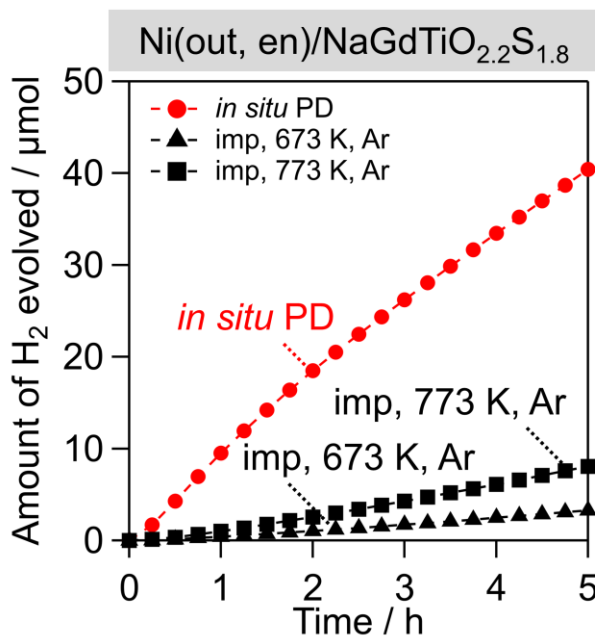

**Figure S27.** Time courses of photocatalytic H<sub>2</sub> evolution from water with electron donors (S<sup>2-</sup> and SO<sub>3</sub><sup>2-</sup>) under visible light (400 < λ < 800 nm) on Ni(out, en)/NaGdTiO<sub>2.2</sub>S<sub>1.8</sub> prepared by *in situ* photodeposition (PD) and by impregnation (imp) and calcination at 673 or 773 K under an Ar flow (20 mL/min), using [Ni(en)<sub>3</sub>](NO<sub>3</sub>)<sub>2</sub> as the Ni precursor (0.5 wt% as Ni metal).

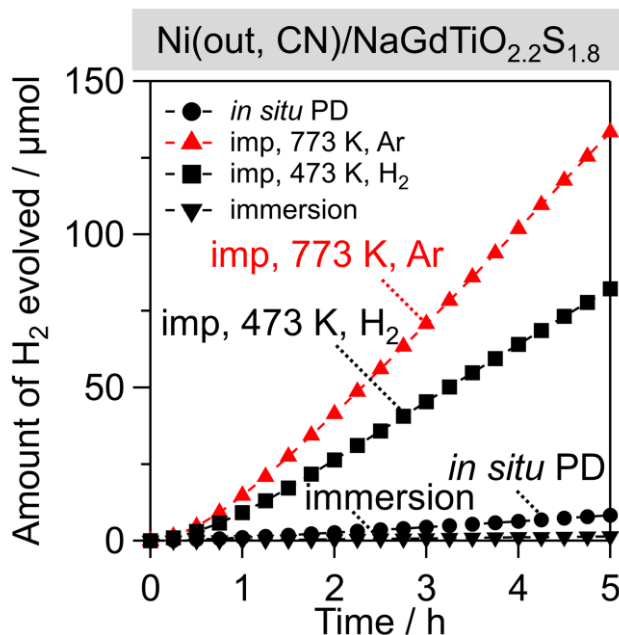

**Figure S28.** Time courses of photocatalytic H<sub>2</sub> evolution from water with electron donors (S<sup>2-</sup> and SO<sub>3</sub><sup>2-</sup>) under visible light (400 <math>\lambda</math> <math>< 800</math> nm) on Ni(out, CN)/NaGdTiO<sub>2.2</sub>S<sub>1.8</sub> prepared by *in situ* PD, by immersion in the Ni precursor aqueous solution for 24 h (immersion) and by impregnation (imp) followed by calcination at 773 K under an Ar flow (20 mL/min) and at 473 K under an H<sub>2</sub> flow (20 mL/min), using K<sub>2</sub>[Ni(CN)<sub>4</sub>] as the Ni precursor (0.5 wt% as Ni metal).

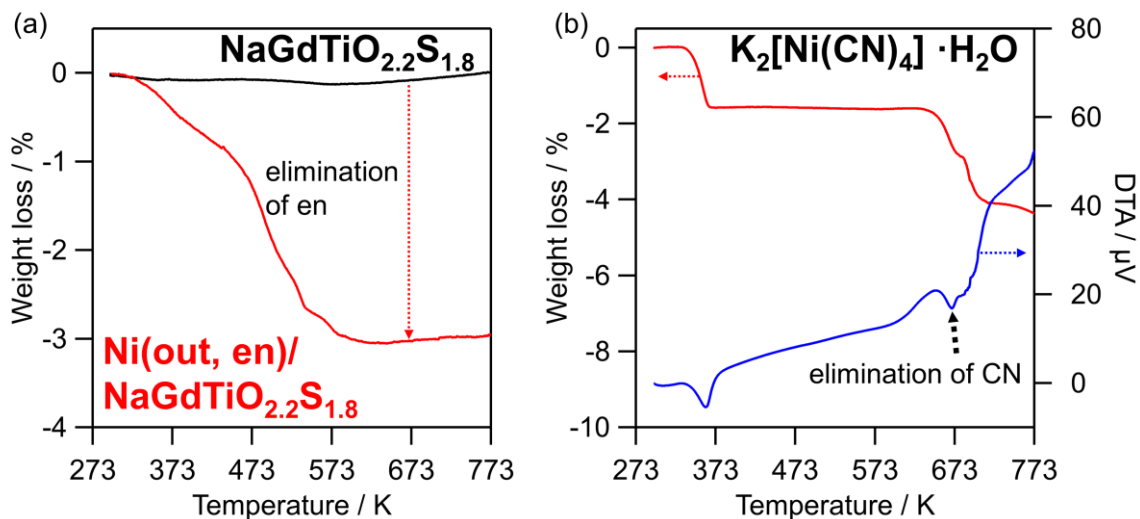

**Figure S29.** TG-DTA profiles under an N<sub>2</sub> flow (100 mL/min) of (a) NaGdTiO<sub>2.2</sub>S<sub>1.8</sub> and Ni(out, en)/NaGdTiO<sub>2.2</sub>S<sub>1.8</sub> prepared by the impregnation method before calcination and (b) the Ni precursor K<sub>2</sub>[Ni(CN)<sub>4</sub>]·H<sub>2</sub>O used for surface loading on NaGdTiO<sub>2.2</sub>S<sub>1.8</sub>.

The calcination temperatures for Ni(out, en)/NaGdTiO<sub>2.2</sub>S<sub>1.8</sub> and Ni(out, CN)/NaGdTiO<sub>2.2</sub>S<sub>1.8</sub> after impregnation were set above 673 and 773 K, respectively, based on the TG-DTA measurements (Figure S29), at which the dissociation of the en and CN ligands was observed.

**Table S9.** Amount of photocatalytic H<sub>2</sub> evolution at 5 h on bare NaGdTiO<sub>2.2</sub>S<sub>1.8</sub> and 0.5 wt% Ni-loaded NaGdTiO<sub>2.2</sub>S<sub>1.8</sub> (Ni(in), Ni(out, CN) and Ni(out, en)), prepared under optimized conditions, from water with electron donors (S<sup>2-</sup> and SO<sub>3</sub><sup>2-</sup>) under visible light (400 <  $\lambda$  < 800 nm).

| M/NaGdTiO <sub>2.2</sub> S <sub>1.8</sub>              | M = bare | M = Ni(in) | M = Ni(out, CN) | M = Ni(out, en) |
|--------------------------------------------------------|----------|------------|-----------------|-----------------|
| Amount of H <sub>2</sub> evolution at 5 h ( $\mu$ mol) | 8.0      | 1056.7     | 133.3           | 40.4            |

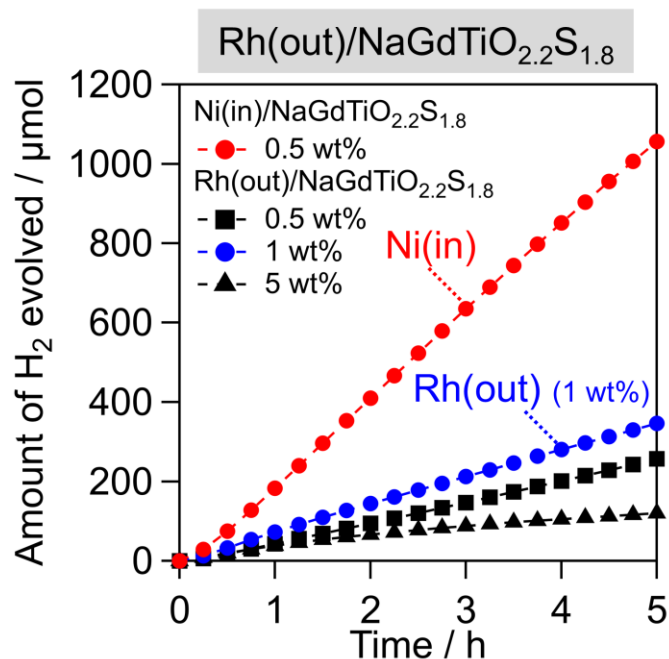

**Figure S30.** Time courses of photocatalytic H<sub>2</sub> evolution on Ni(in)/NaGdTiO<sub>2.2</sub>S<sub>1.8</sub> loaded with 0.5 wt% Ni species (as Ni metal) and Rh(out)/NaGdTiO<sub>2.2</sub>S<sub>1.8</sub> loaded with different amounts of Rh species from water with electron donors (S<sup>2-</sup> and SO<sub>3</sub><sup>2-</sup>) under visible light (400 <  $\lambda$  < 800 nm).

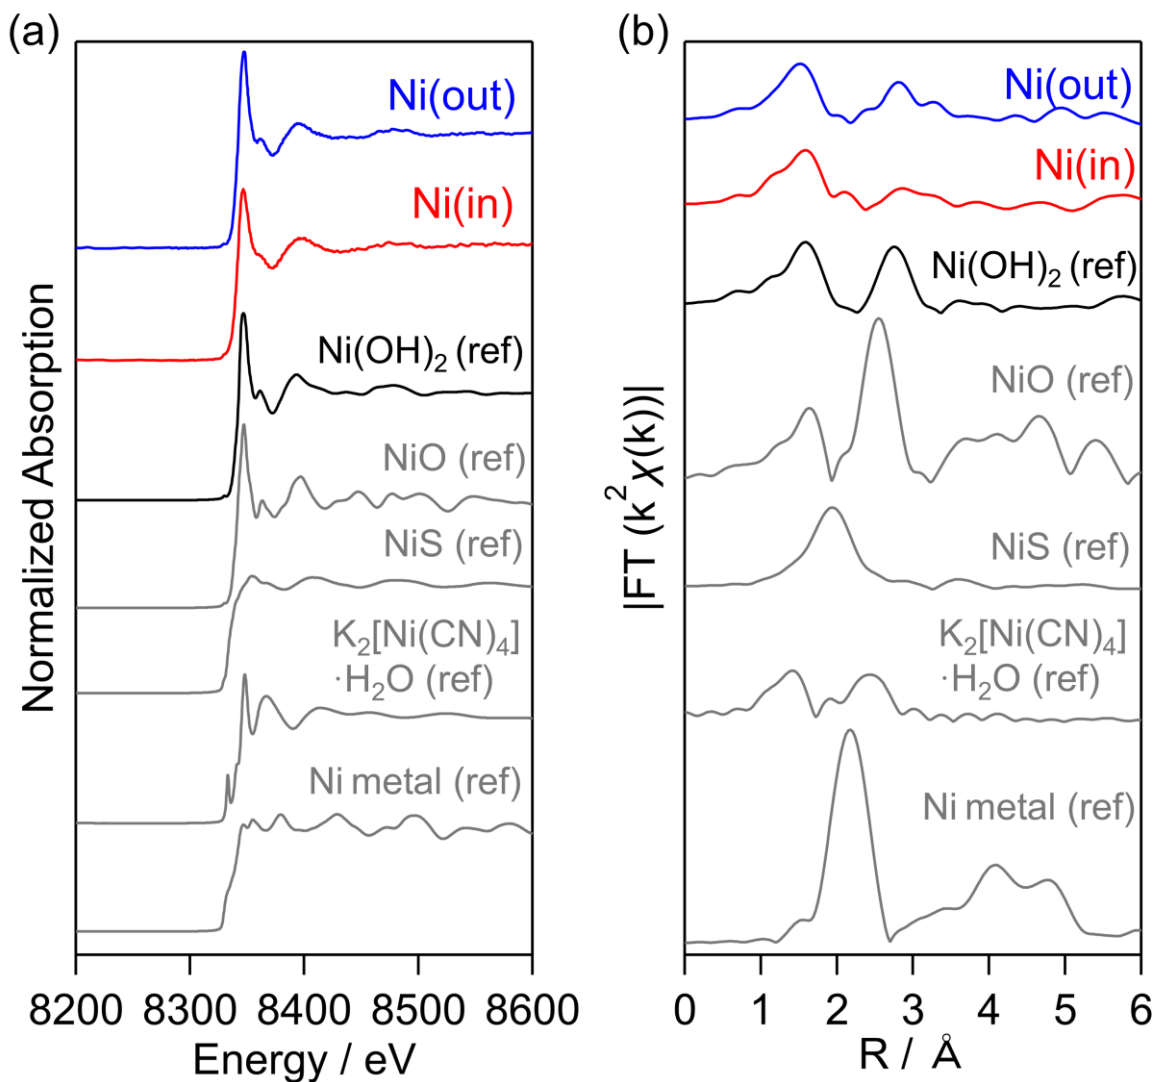

**Figure S31.** Ni K-edge (a) XANES and (b) Fourier transforms of EXAFS spectra for Ni/NaGdTiO<sub>2.2</sub>S<sub>1.8</sub> (Ni(in) and Ni(out)) after the photocatalytic H<sub>2</sub> evolution reaction, along with the spectra of reference samples.

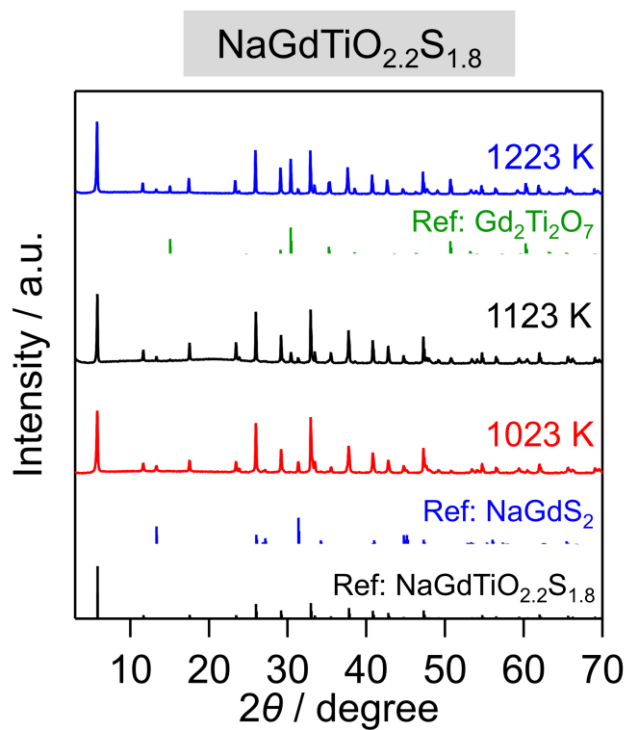

**Figure S32.** XRD patterns of NaGdTiO<sub>2.2</sub>S<sub>1.8</sub> synthesized *via* SSR at 1023–1223 K, along with reference patterns of NaGdTiO<sub>2.2</sub>S<sub>1.8</sub> (this study), NaGdS<sub>2</sub> (ICSD #48243) and Gd<sub>2</sub>Ti<sub>2</sub>O<sub>7</sub> (ICSD #19687).

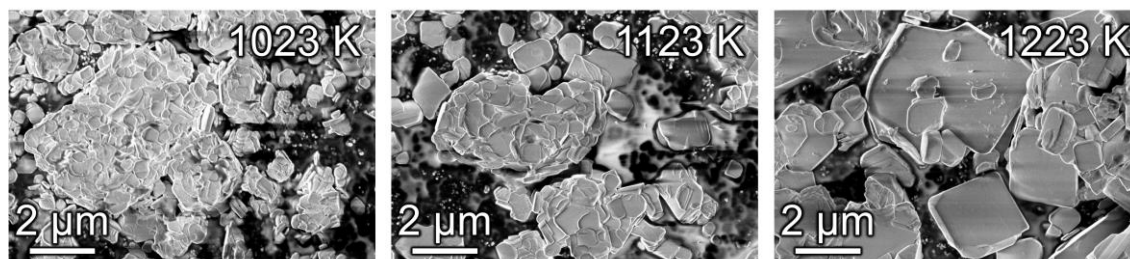

**Figure S33.** SEM images of NaGdTiO<sub>2.2</sub>S<sub>1.8</sub> obtained *via* SSR at 1023–1223 K.

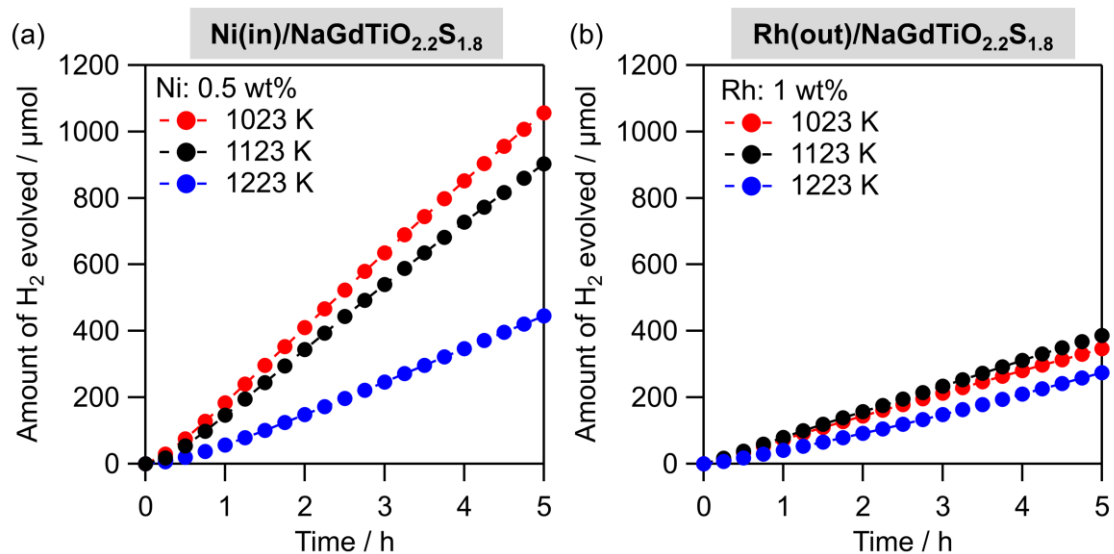

**Figure S34.** Time courses of photocatalytic H<sub>2</sub> evolution on (a) Ni(in)/NaGdTiO<sub>2.2</sub>S<sub>1.8</sub> and (b) Rh(out)/NaGdTiO<sub>2.2</sub>S<sub>1.8</sub> synthesized *via* SSR at 1023–1223 K from water with electron donors (S<sup>2-</sup> and SO<sub>3</sub><sup>2-</sup>) under visible light (400 < λ < 800 nm).

#### References

- 1 Y. Ishii, H. Suzuki, D. Kato, O. Tomita, A. Nakada and R. Abe, *Chem. Sci.*, 2025, **16**, 16534–16541.
- 2 I. A. Zvereva, O. I. Silyukov and M. V. Chislov, *Russ. J. Gen. Chem.*, 2011, **81**, 1434.
- 3 H. B. Mark. Jr., *J. Electroanal. Chem.*, 1964, **8**, 253–261.
